# Supplementary material for: Negative correlation between microRNA and insulin sensitivity gene expression in adipose tissue: potential implications for diabetes and neurodegenerative diseases
Source: Research Square preprint supplement (doi:10.21203/rs.3.rs-7376799/v1), 2025-09-03
Supplement: Supplementary file 1 [file c75b44cc4846991de780f955.docx]

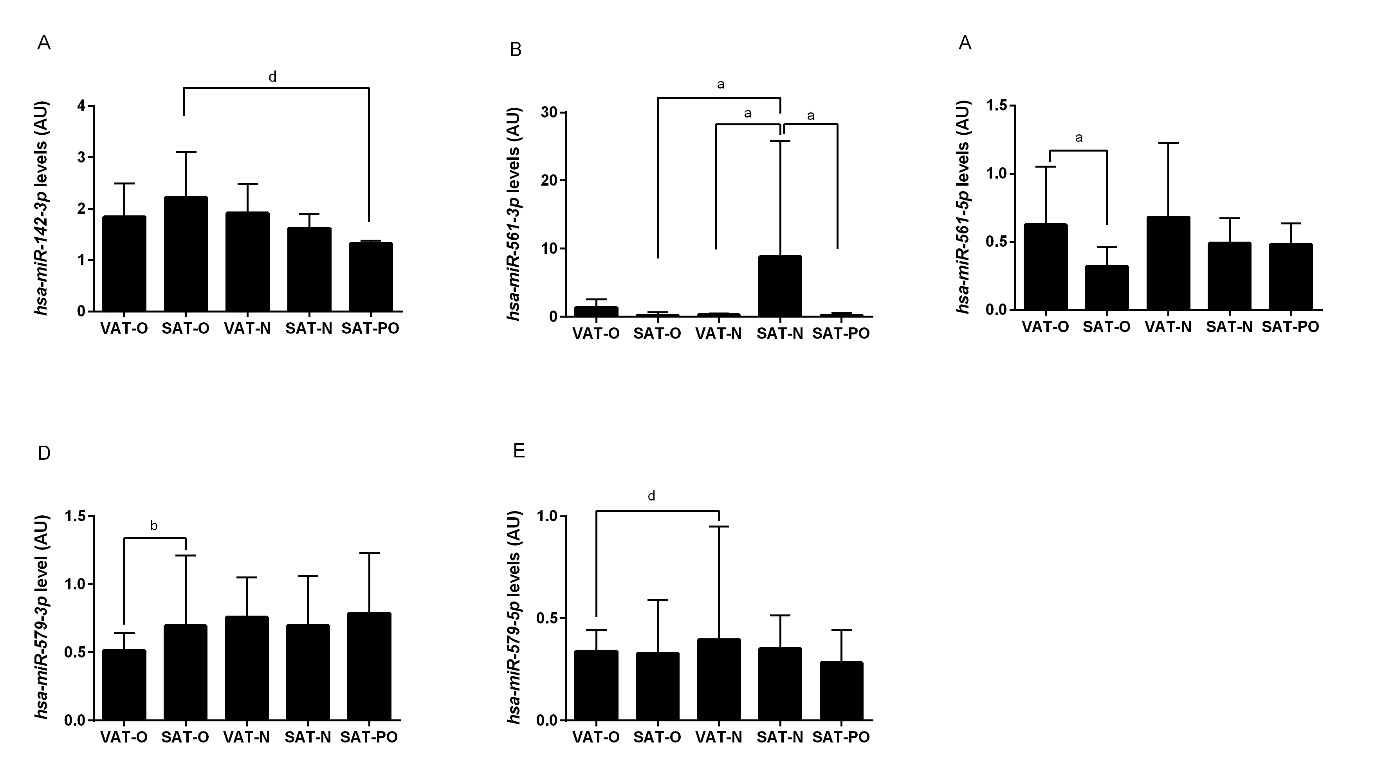


**Supplementary Figure S1.** Expression of*hsa-miR-142-3p* (**A**),*hsa-miR-561-3p*(**B**), *hsa-miR-561-5p*(**C**), *hsa-miR-579-3p*(**D**) and *hsa-miR-579-5p*(**E**) in the visceral (VAT) and subcutaneous (SAT) adipose tissues of the obese individuals before (O) and after surgically induced weight loss (PO) and in the normal-weight subjects (N). Results normalized to *hsa-miR-103a-3p*concentration are presented as the median with the interquartile range. “a” *p* < 0.0001; “b” *p* < 0.001; “d” *p* <
