# Supplementary material for: Negative correlation between microRNA and insulin sensitivity gene expression in adipose tissue: potential implications for diabetes and neurodegenerative diseases
Source: Research Square preprint supplement (doi:10.21203/rs.3.rs-7376799/v1), 2025-09-03
Supplement: Supplementary file 2 [file f2888c69936b3fa7e550e387.docx]

|  | **Obese individuals**  **before weight loss**  **(N = 75)** | | **Obese individuals**  **after weight loss**  **(N = 19)** | | **P value** |
| --- | --- | --- | --- | --- | --- |
| Males/Females | 13/62 | | 4/15 | |  |
|  | **Mean ± SD** | **Min–Max** | **Mean ± SD** | **Min–Max** |  |
| Age (years) | 41.4 ± 10.2 | 20 - 62 | 41.5 ± 10.3 | 28 - 67 | NS |
| BMI (kg/m2) | 46.3 ± 5.5 | 40.1 - 59.5 | 27.2 ± 2.3 | 24.3 - 29.5 | P < 0.001 |
| Adipose tissue (% body mass) | 47.1 ± 5.2 | 32.6 - 59.5 | 30.5± 3.3 | 24.8 - 34.0 | P < 0.001 |
| Waist circumference (m) | 1.2 ± 0.2 | 1.0 - 1.7 | 0.9 ± 0.1 | 0.8 - 1.1 | P = 0.047 |
| Weight loss (kg) | – | – | 47.8 ± 10.4 | 35.2 - 65.6 | - |
| TSH (mIU/l) | 1.8 ± 1.3 | 0.3 - 5.6 | 1.6 ± 0.2 | 1.1 - 1.3 | NS |
| Glucose (mmol/L) | 6.0 ± 1.4 | 3.5 - 11.1 | 4.8 ± 0.5 | 4.1 - 5.7 | P = 0.012 |
| Total cholesterol (mmol/L) | 4.9 ± 1.1 | 2.4 - 7.9 | 4.6 ± 0.9 | 3.5 - 5.9 | P = 0.038 |
| HDL cholesterol (mmol/L) | 0.97 ±0.3 | 0.75 - 1.3 | 1.12 ±0.2 | 0.9 - 1.29 | NS |
| Triglicerides (mmol/L) | 2.9±0.3 | 2.6 - 3.2 | 1.9±0.4 | 1.5 - 2.4 | P = 0.024 |
| Triglicerides/HDL ratio* | 5.4 ±1.8 | 3.6-7.4 | 4.2±0.7 | 3.4-4.8 | P < 0.001 |

**Supplementary Table 1.** Basic clinical characteristics of the patients with obesity before and after weight-loss surgery.

*The triglycerides/HDL ratio was calculated in 58 subjects not taking hypolipemic drugs and in all patients after bariatric surgery.

BMI – body mass index, HDL – high density lipoprotein, N – number of individuals, NS – nonsignificant, SD – standard deviation, TSH – thyroid stimulating hormone

|  | **Patients diagnosed**  **with type 2 diabetes**  **(N = 25)** | | **Patients without**  **type 2 diabetes**  **(N = 50)** | | **P value** |
| --- | --- | --- | --- | --- | --- |
| Males/Females | 7/18 | | 8/42 | |  |
|  | **Mean ± SD** | **Min–Max** | **Mean ± SD** | **Min–Max** |  |
| Age (years) | 46.2 ± 9.2 | 38.2 - 62 | 40.3 ± 10.3 | 20 - 60 | P = 0.048 |
| BMI (kg/m2) | 46.3 ± 5.5 | 40.1 - 59.5 | 27.2 ± 2.3 | 24.3 - 29.5 | NS |
| Adipose tissue (% body mass) | 52.1 ± 4.2 | 45.1- 59.5 | 45.6 ± 10.1 | 32.6 – 55.2 | P = 0.04 |
| Waist circumference (m) | 1.3 ± 0.2 | 1.1 - 1.7 | 1.2 ± 0.1 | 0.8 - 1.6 | NS |
| TSH (mIU/l) | 1.7 ± 1.4 | 0.6 - 4.4 | 1.6 ± 1.3 | 0.3 – 5.6 | NS |
| Glucose (mmol/L) | 8.7 ± 2.4 | 6.0 - 11.1 | 4.8 ± 0.6 | 3.5 - 5.5 | P = 0.008 |
| Total cholesterol (mmol/L) | 5.2 ± 1.0 | 3.8 - 7.9 | 4.6 ± 0.9 | 2.4 - 5.9 | NS |
| HDL cholesterol (mmol/L) | 0.78 ±0.2 | 0.75 - 1.1 | 0.95 ±0.12 | 0.85 - 1.3 | NS |
| Triglicerides (mmol/L) | 3.2 ± 0.3 | 2.8 - 3.7 | 2.9 ± 0.3 | 2.6 - 3.4 | P = 0.046 |
| Triglicerides/HDL ratio* | 6.4 ± 0.8 | 5.2 - 7.4 | 4.2 ± 0.6 | 3.6 - 5.3 | P = 0.02 |

**Supplementary Table 2.** Basic clinical characteristics of the patients with obesity before weight loss stratified by the presence of type 2 diabetes.

*The triglycerides/HDL ratio was calculated in subjects not taking hypolipemic drugs.

BMI – body mass index, HDL – high density lipoprotein, N – number of individuals, NS – nonsignificant, SD – standard deviation, TSH – thyroid stimulating hormone
